# Supplementary material for: Signal, noise and skill in sub-seasonal forecasts: the role of teleconnections
Source: Copernicus journal article supplement (doi:10.5194/egusphere-2025-2556), 2025-06-30
Supplement: Supplementary file 1 [file egusphere-2025-2556-supplement.pdf]

# Signal, noise and skill in sub-seasonal forecasts: the role of teleconnections

Alexey Yu. Karpechko<sup>1</sup>, Amy H. Butler<sup>2</sup>, Frederic Vitart<sup>3</sup>

<sup>1</sup>Finnish Meteorological Institute, Helsinki, 00101, Finland

<sup>2</sup>National Oceanic and Atmospheric Administration (NOAA) Chemical Sciences Laboratory, Boulder, CO, 80305, USA

<sup>3</sup>European Centre for Medium-range Weather Forecasts, Reading, RG2 9AX, UK

Correspondence to: Alexey Yu. Karpechko (alexey.karpechko@fmi.fi)

## Supplementary Materials

**Table S1:** Spatial correlation coefficients between the changes in the forecast skill ( $\Delta\rho$ ) and changes in the forecast properties ( $\Delta\sigma_{EM}^2$ ,  $\Delta\sigma_{ES}^2$ ,  $\Delta STN$ ,  $\Delta\rho_{perf}$ ) for T2M in the relaxation experiments.

|           | TROP                  |                       |              |                     | STRAT                 |                       |              |                     |
|-----------|-----------------------|-----------------------|--------------|---------------------|-----------------------|-----------------------|--------------|---------------------|
|           | $\Delta\sigma_{EM}^2$ | $\Delta\sigma_{ES}^2$ | $\Delta STN$ | $\Delta\rho_{perf}$ | $\Delta\sigma_{EM}^2$ | $\Delta\sigma_{ES}^2$ | $\Delta STN$ | $\Delta\rho_{perf}$ |
| Weeks 1-2 | -0.03                 | -0.05                 | 0.25         | 0.42                | 0.04                  | -0.09                 | -0.03        | 0.01                |
| Weeks 3-4 | 0.10                  | -0.06                 | 0.44         | 0.51                | 0.29                  | -0.15                 | 0.16         | 0.28                |
| Weeks 5-6 | 0.03                  | -0.23                 | 0.34         | 0.36                | 0.14                  | 0.00                  | 0.08         | 0.16                |

**Table S2:** Spatial correlation coefficients between the changes in the forecast skill ( $\Delta\rho$ ) and changes in the forecast properties ( $\Delta\sigma_{EM}^2$ ,  $\Delta\sigma_{ES}^2$ ,  $\Delta STN$ ,  $\Delta\rho_{perf}$ ) for TP in the relaxation experiments.

|           | TROP                  |                       |              |                     | STRAT                 |                       |              |                     |
|-----------|-----------------------|-----------------------|--------------|---------------------|-----------------------|-----------------------|--------------|---------------------|
|           | $\Delta\sigma_{EM}^2$ | $\Delta\sigma_{ES}^2$ | $\Delta STN$ | $\Delta\rho_{perf}$ | $\Delta\sigma_{EM}^2$ | $\Delta\sigma_{ES}^2$ | $\Delta STN$ | $\Delta\rho_{perf}$ |
| Weeks 1-2 | 0.06                  | -0.12                 | 0.15         | 0.13                | 0.01                  | -0.03                 | 0.02         | 0.04                |
| Weeks 3-4 | 0.26                  | -0.26                 | 0.33         | 0.34                | 0.02                  | 0.02                  | 0.07         | 0.07                |
| Weeks 5-6 | 0.33                  | -0.22                 | 0.39         | 0.40                | 0.08                  | -0.08                 | 0.14         | 0.15                |

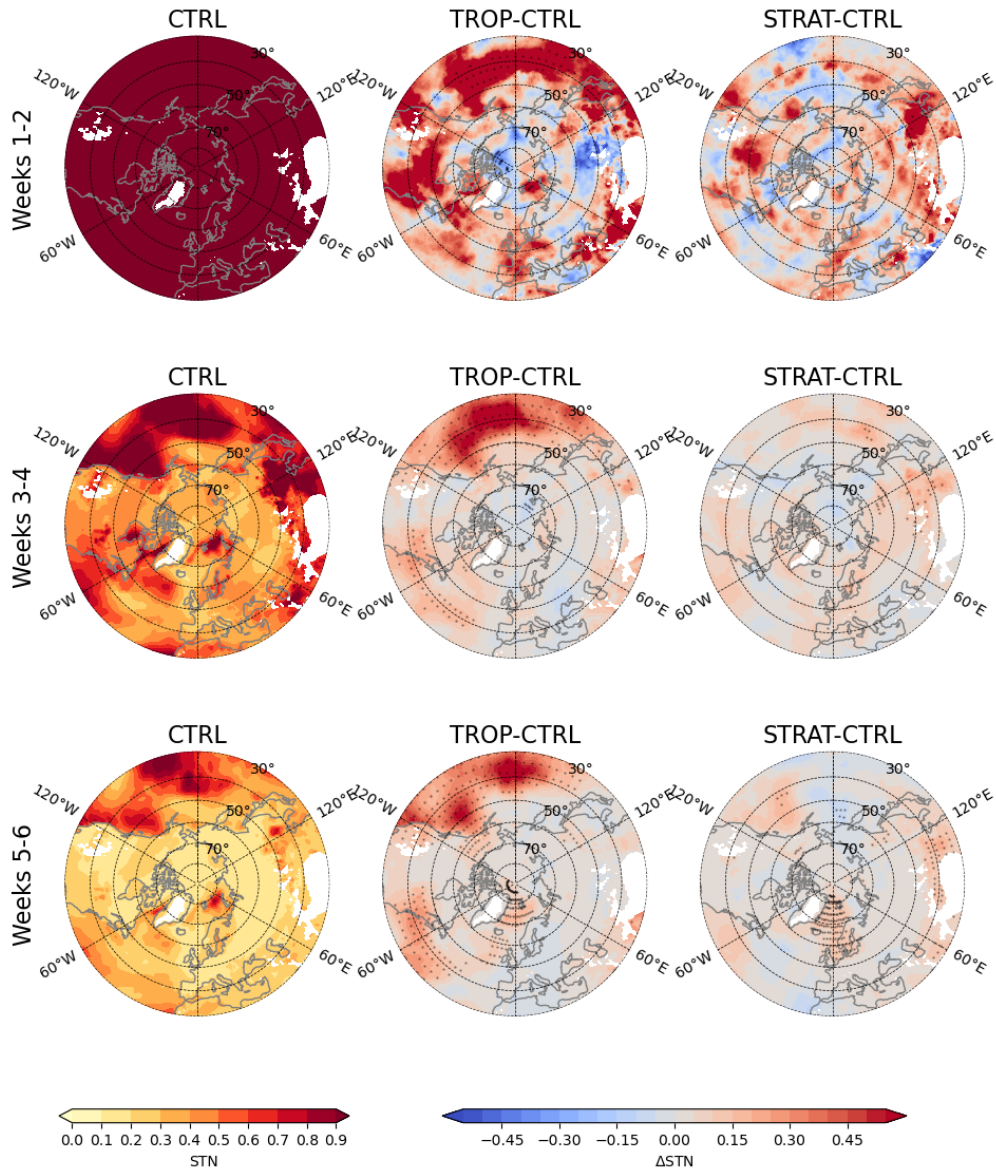

**Figure S1:** Signal to noise ratio (STN) for bi-weekly mean T2M anomalies for (left) CTRL; and the differences between  $\rho$  in (center) TROP and (right) STRAT experiments with respect to CTRL. Stippling in (center, right) indicates significant differences between CTRL and the respective relaxation experiments.

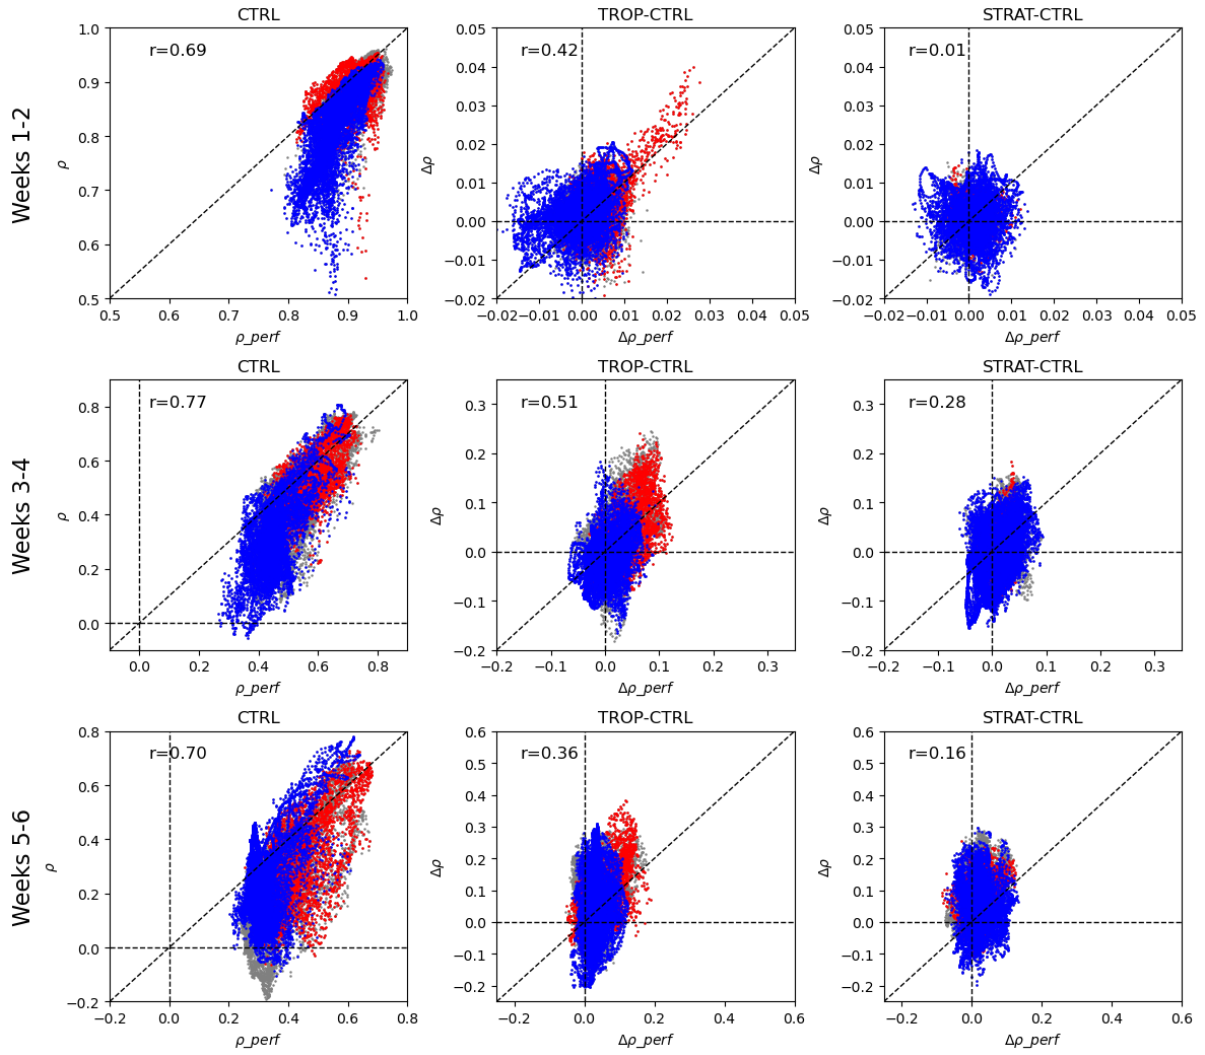

**Figure S2:** Scatterplots between  $\rho$  and  $\rho_{perf}$  for T2M anomalies at each grid point between 30°N and 90°N. 2nd and 3<sup>rd</sup> columns show differences for  $\rho$  and  $\rho_{perf}$  between relaxation experiments (TROP and STRAT respectively) and CTRL.  $r$ -values show spatial correlation coefficients between  $\rho$  and  $\rho_{perf}$  fields. Red dots mark grid points south of 40°N, blue dots mark grid points north of 60°N, and grey dots mark grid points between 40°N-60°N.

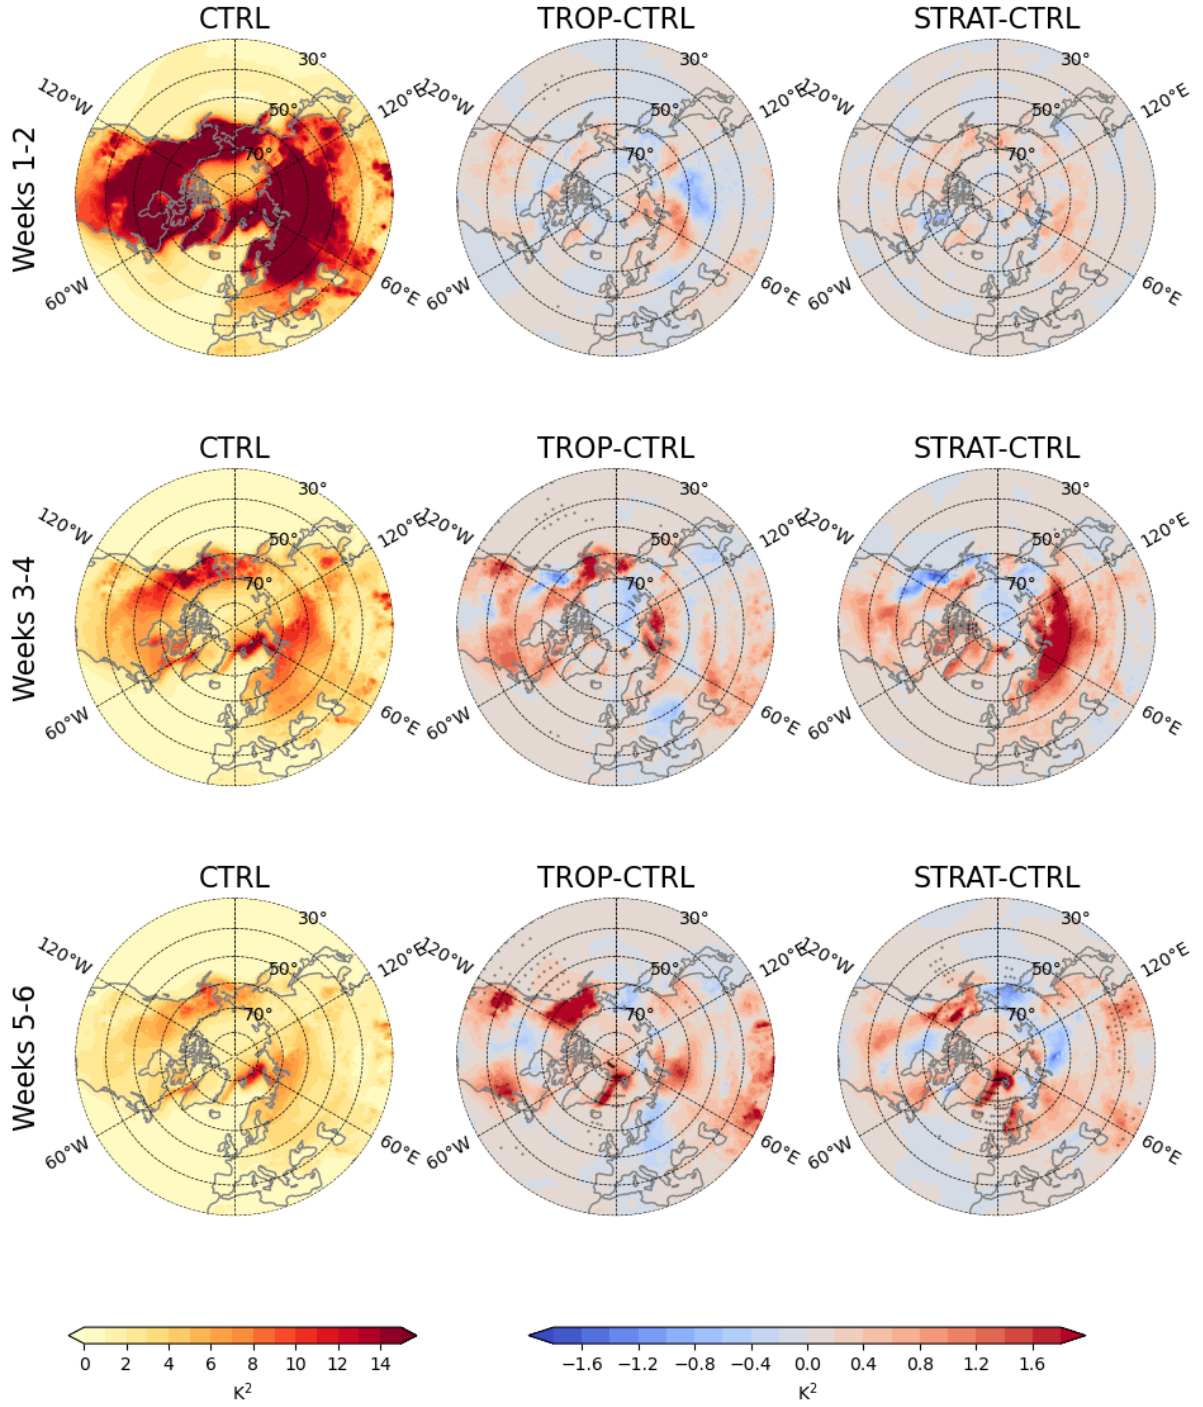

**Figure S3:** Variability of ensemble mean ( $\sigma_{EM}^2$ ) for bi-weekly mean T2M anomalies for (left) CTRL; and the differences between  $\sigma_{EM}^2$  in (center) TROP and (right) STRAT experiments with respect to CTRL. Stippling in (center, right) indicates significant differences between CTRL and the respective relaxation experiments.



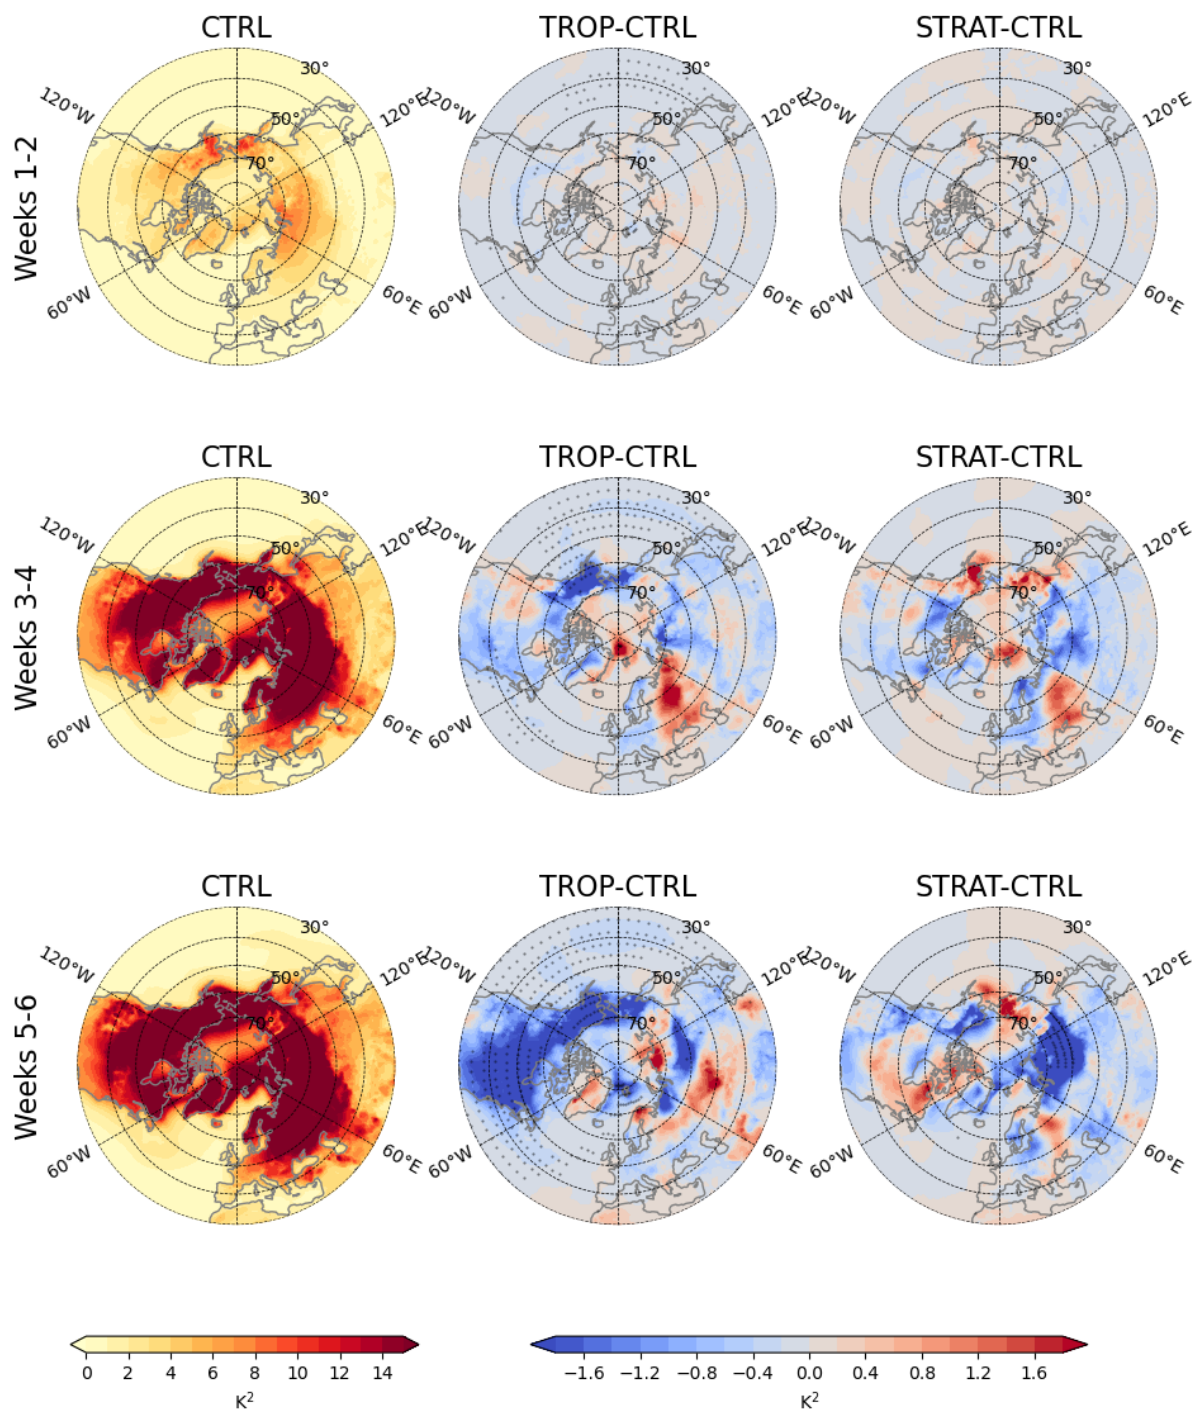

**Figure S4:** Ensemble spread ( $\sigma_{ES}^2$ ) for bi-weekly mean T2M anomalies for (left) CTRL; and the differences between  $\sigma_{ES}^2$  in (center) TROP and (right) STRAT experiments with respect to CTRL. Stippling in (center, right) indicates significant differences between CTRL and the respective relaxation experiments.

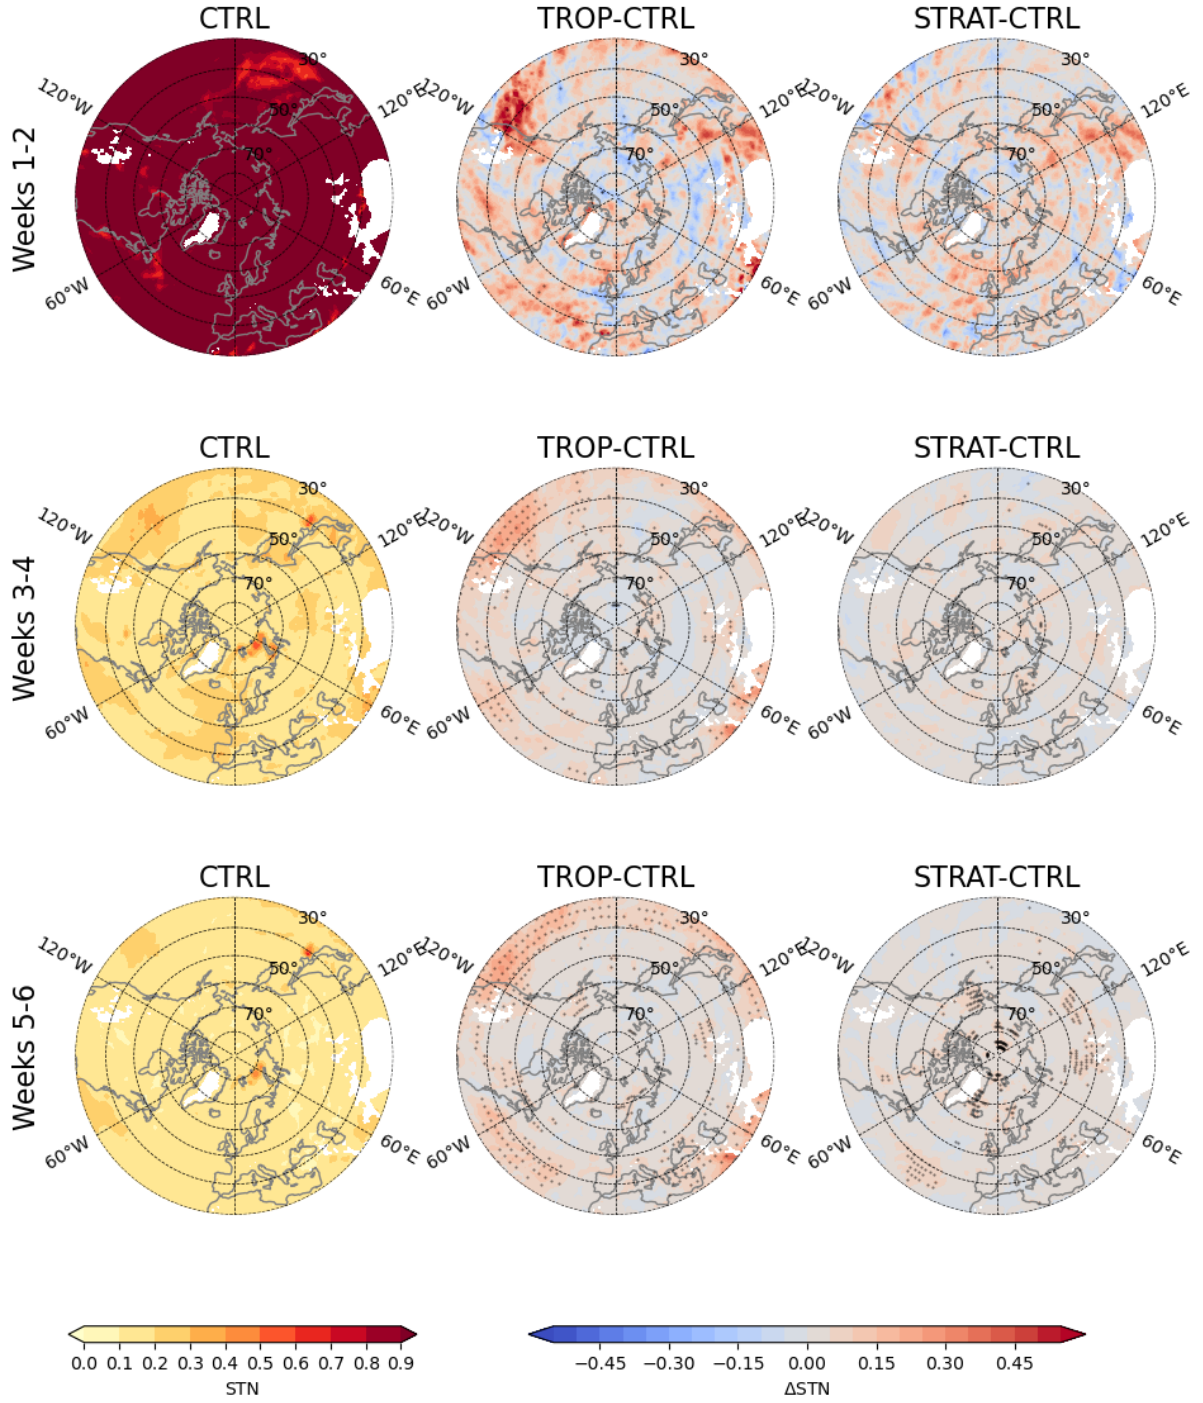

**Figure S5:** Signal to noise ratio (STN) for bi-weekly mean TP anomalies for (left) CTRL; and the differences between  $p$  in (center) TROP and (right) STRAT experiments with respect to CTRL. Stippling in (center, right) indicates significant differences between CTRL and the respective relaxation experiments.

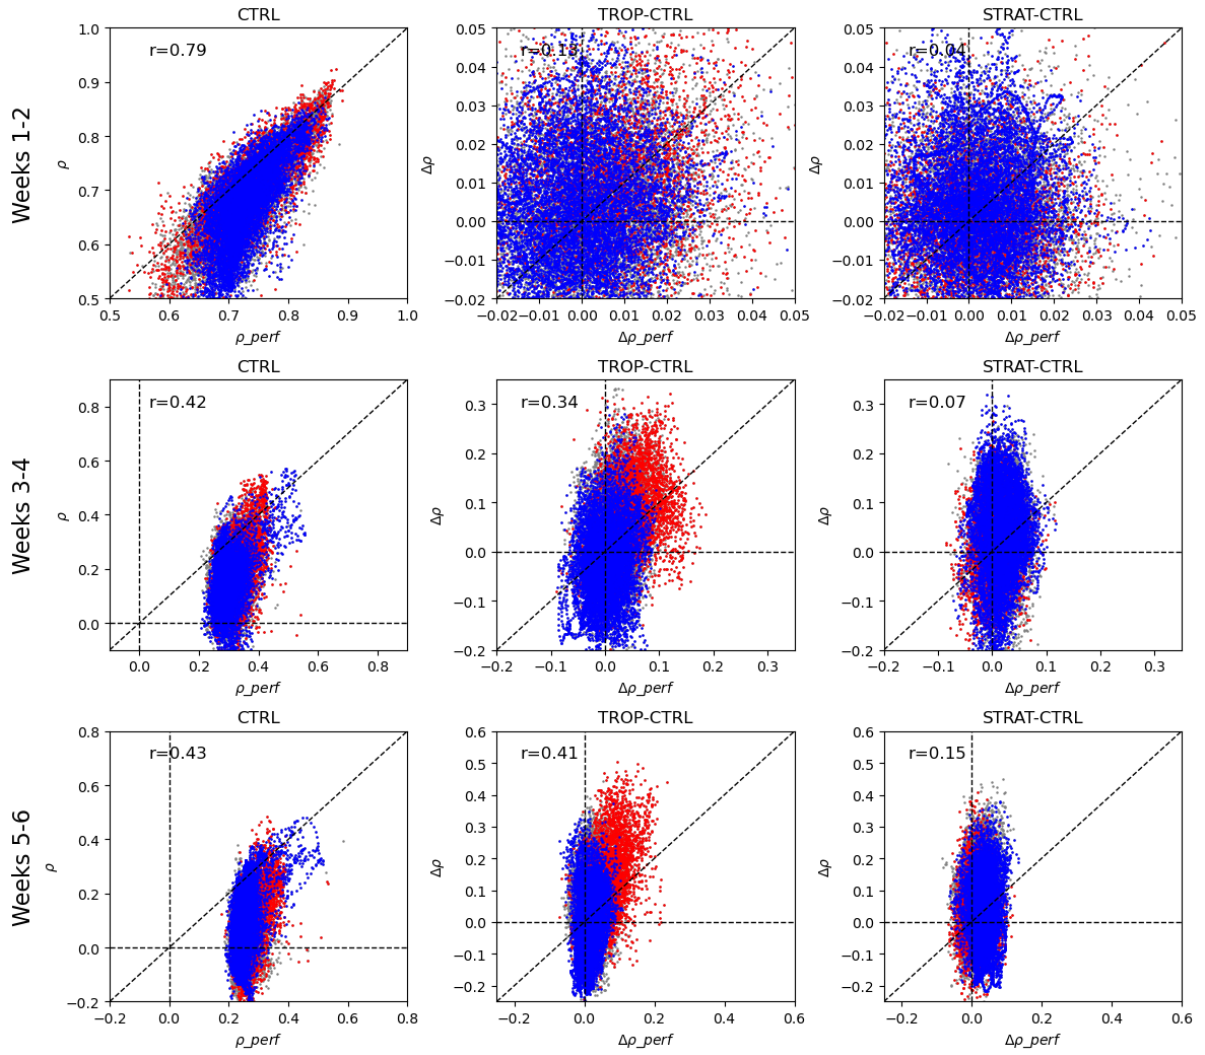

**Figure S6:** Scatterplots between  $\rho$  and  $\rho_{perf}$  for TP anomalies at each grid point between 30°N and 90°N. 2nd and 3<sup>rd</sup> columns show differences for  $\rho$  and  $\rho_{perf}$  between relaxation experiments (TROP and STRAT respectively) and CTRL.  $r$ -values show spatial correlation coefficients between  $\rho$  and  $\rho_{perf}$  fields. Red dots mark grid points south of 40°N, blue dots mark grid points north of 60°N, and grey dots mark grid points between 40°N-60°N.



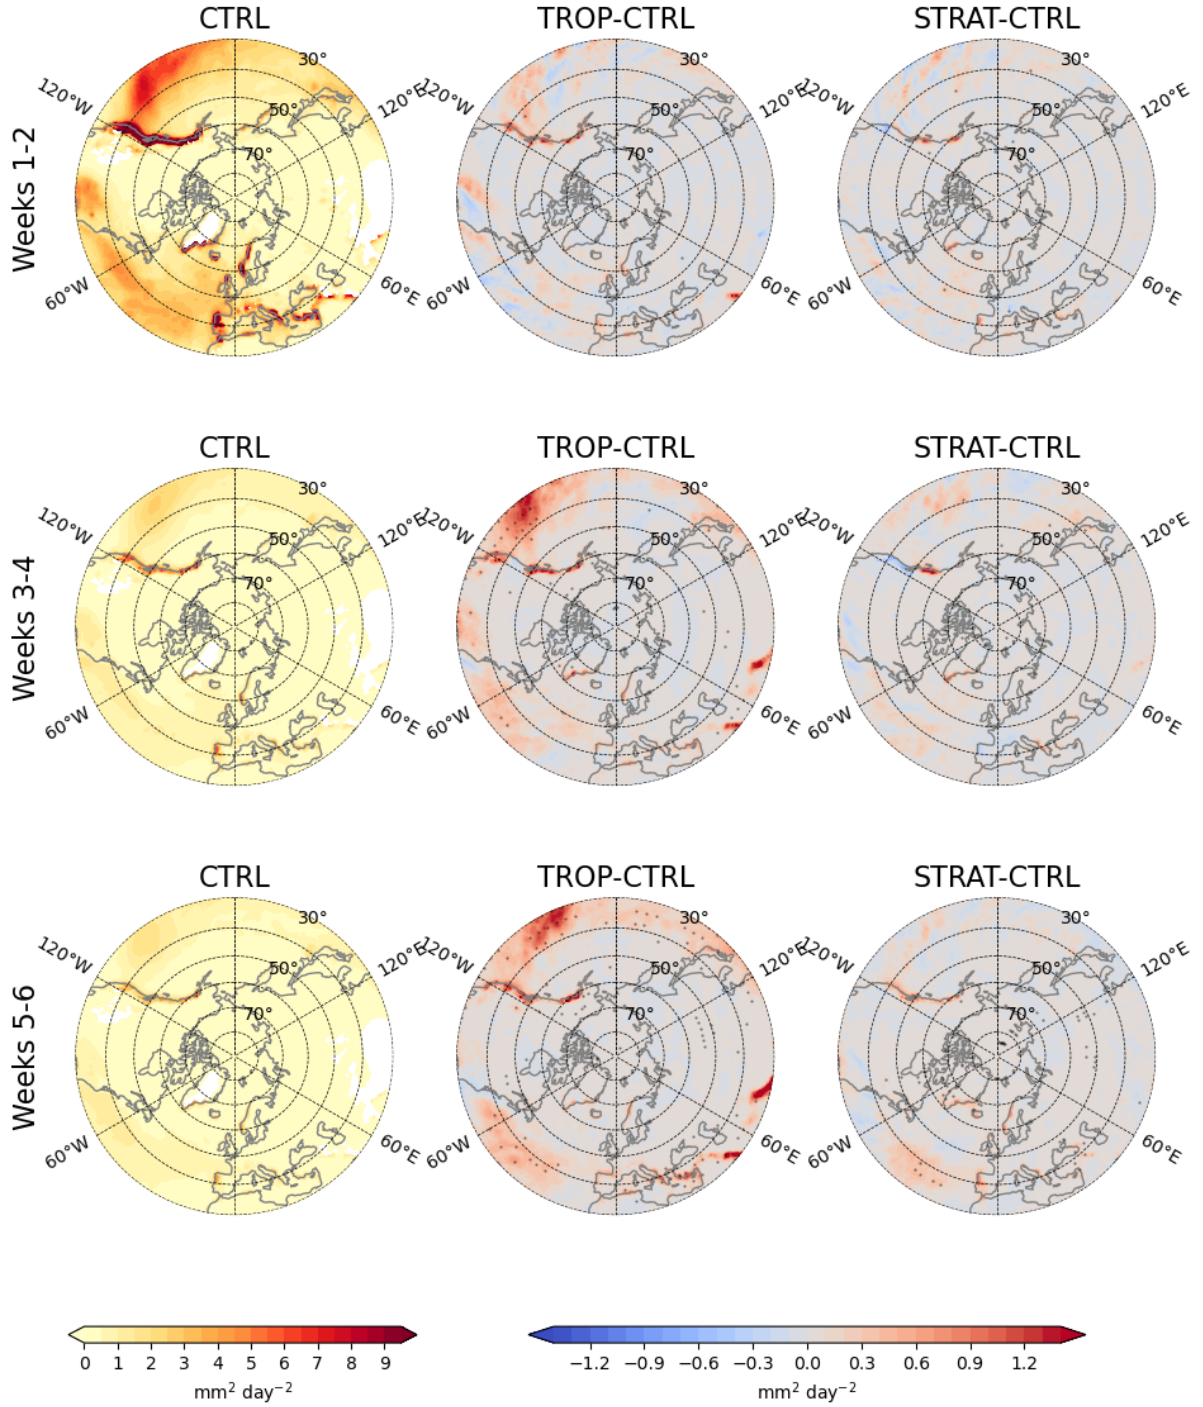

**Figure S7:** Variability of ensemble mean ( $\sigma_{EM}^2$ ) for bi-weekly mean TP anomalies for (left) CTRL; and the differences between  $\sigma_{EM}^2$  in (center) TROP and (right) STRAT experiments with respect to CTRL. Stippling in (center, right) indicates significant differences between CTRL and the respective relaxation experiments.



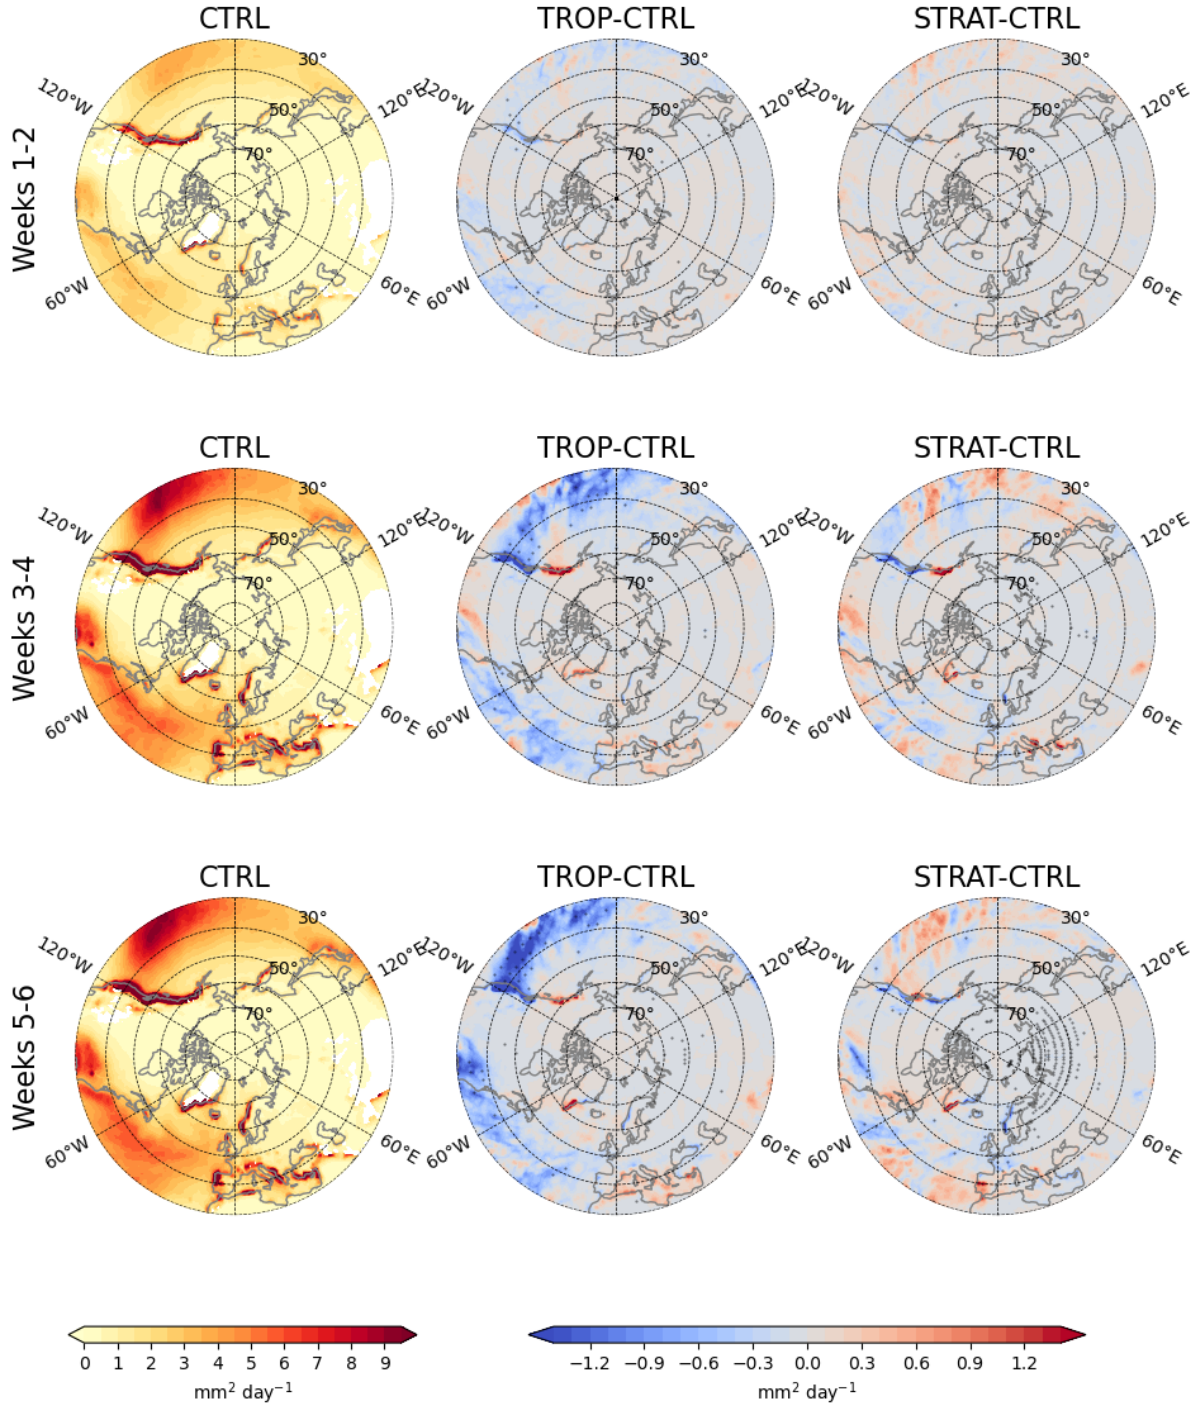

**Figure S8:** Ensemble spread ( $\sigma_{ES}^2$ ) for bi-weekly mean TP anomalies for (left) CTRL; and the differences between  $\sigma_{ES}^2$  in (center) TROP and (right) STRAT experiments with respect to CTRL. Stippling in (center, right) indicates significant differences between CTRL and the respective relaxation experiments.
